# Supplementary material for: Verifying inflammation and pancreatic blood flow in a mouse model of post-endoscopic retrograde cholangiopancreatography
Source: Research Square preprint supplement (doi:10.21203/rs.3.rs-5857284/v1), 2025-03-31
Supplement: Supplementary file 1 [file 30ba73306fbef1e069f18006.docx]

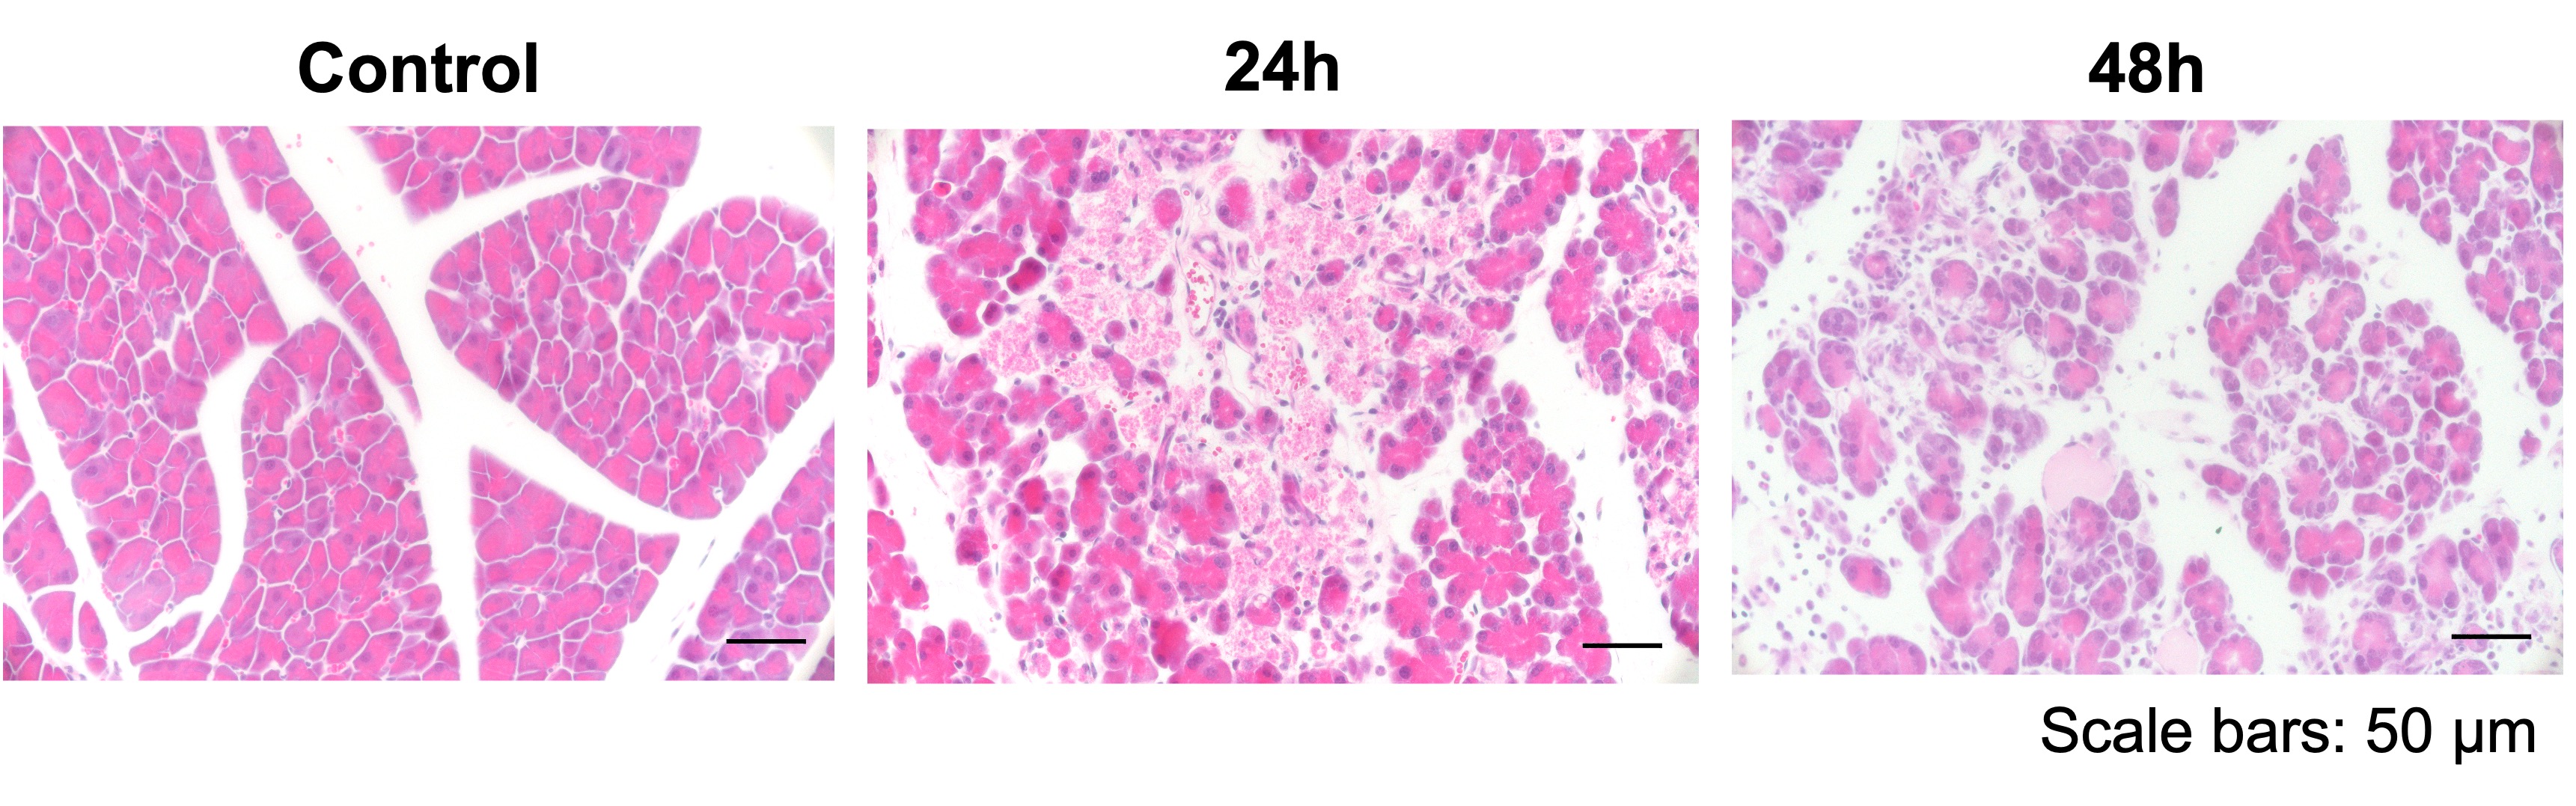


**Supplementary Fig. 1 | Inflammation caused by injecting 0.5 mL of saline solution into the pancreatic duct.** Inflammation was induced in the same manner as the contrast medium.
